# Supplementary material for: Time-Course Gene Set Analysis for Longitudinal Gene Expression Data
Source: PLOS journal article supplement (doi:10.1371/journal.pcbi.1004310), 2015-06-25
Supplement: S5 (10.1371/journal.pcbi.1004310.s005) [file journal.pcbi.1004310.s005]

**Table S2.** Selected GO pathways for investigating DALIA-1

|    | GO ID        | Description                                                                               |
|----|--------------|-------------------------------------------------------------------------------------------|
| 1  | GO:0002218 † | activation of innate immune response                                                      |
| 2  | GO:0006956 † | complement activation                                                                     |
| 3  | GO:0002429 † | immune response-activating cell surface receptor signaling pathway                        |
| 4  | GO:0002758 † | innate immune response-activating signal transduction                                     |
| 5  | GO:0019883 † | antigen processing and presentation of endogenous antigen                                 |
| 6  | GO:0019884 † | antigen processing and presentation of exogenous antigen                                  |
| 7  | GO:0048002 † | antigen processing and presentation of peptide antigen                                    |
| 8  | GO:0002504 † | antigen processing and presentation of peptide or polysaccharide antigen via MHC class II |
| 9  | GO:0002475   | antigen processing and presentation via MHC class Ib                                      |
| 10 | GO:0002468   | dendritic cell antigen processing and presentation                                        |
| 11 | GO:0002578   | negative regulation of antigen processing and presentation                                |
| 12 | GO:0002579 † | positive regulation of antigen processing and presentation                                |
| 13 | GO:0002577 † | regulation of antigen processing and presentation                                         |
| 14 | GO:0002457   | T cell antigen processing and presentation                                                |
| 15 | GO:0002339   | B cell selection                                                                          |
| 16 | GO:0002263 † | cell activation involved in immune response                                               |
| 17 | GO:0051607 † | defense response to virus                                                                 |
| 18 | GO:0002432   | granuloma formation                                                                       |
| 19 | GO:0002434   | immune complex clearance                                                                  |
| 20 | GO:0043299 † | leukocyte degranulation                                                                   |
| 21 | GO:0001909 † | leukocyte mediated cytotoxicity                                                           |
| 22 | GO:0019724 † | B cell mediated immunity                                                                  |
| 23 | GO:0002228 † | natural killer cell mediated immunity                                                     |
| 24 | GO:0002707 † | negative regulation of lymphocyte mediated immunity                                       |
| 25 | GO:0002708 † | positive regulation of lymphocyte mediated immunity                                       |
| 26 | GO:0002706 † | regulation of lymphocyte mediated immunity                                                |
| 27 | GO:0002456 † | T cell mediated immunity                                                                  |
| 28 | GO:0002444 † | myeloid leukocyte mediated immunity                                                       |
| 29 | GO:0002704 † | negative regulation of leukocyte mediated immunity                                        |
| 30 | GO:0002705 † | positive regulation of leukocyte mediated immunity                                        |
| 31 | GO:0002703 † | regulation of leukocyte mediated immunity                                                 |
| 32 | GO:0002522   | leukocyte migration involved in immune response                                           |
| 33 | GO:0002698 † | negative regulation of immune effector process                                            |
| 34 | GO:0008228   | opsonization                                                                              |
| 35 | GO:0002699 † | positive regulation of immune effector process                                            |
| 36 | GO:0002697 † | regulation of immune effector process                                                     |
| 37 | GO:0002679 † | respiratory burst involved in defense response                                            |
| 38 | GO:0002250 † | adaptive immune response                                                                  |
| 39 | GO:0002367 † | cytokine production involved in immune response                                           |
| 40 | GO:0006959 † | humoral immune response                                                                   |
| 41 | GO:0002418 † | immune response to tumor cell                                                             |
| 42 | GO:0002437 † | inflammatory response to antigenic stimulus                                               |
| 43 | GO:0006957 † | complement activation, alternative pathway                                                |
| 44 | GO:0001867   | complement activation, lectin pathway                                                     |
| 45 | GO:0002227   | innate immune response in mucosa                                                          |
| 46 | GO:0045824 † | negative regulation of innate immune response                                             |
| 47 | GO:0045089 † | positive regulation of innate immune response                                             |
| 48 | GO:0045088 † | regulation of innate immune response                                                      |
| 49 | GO:0034341 † | response to interferon-gamma                                                              |
| 50 | GO:0034340 † | response to type I interferon                                                             |
| 51 | GO:0050777 † | negative regulation of immune response                                                    |
| 52 | GO:0002251 † | organ or tissue specific immune response                                                  |
| 53 | GO:0052555   | positive regulation by organism of immune response of other organism                      |
|    |              | involved in symbiotic interaction                                                         |
| 54 | GO:0002821 † | positive regulation of adaptive immune response                                           |
| 55 | GO:0002922   | positive regulation of humoral immune response                                            |
| 56 | GO:0002839 † | positive regulation of immune response to tumor cell                                      |
| 57 | GO:0002863 † | positive regulation of inflammatory response to antigenic stimulus                        |
| 58 | GO:0002830   | positive regulation of type 2 immune response                                             |
| 59 | GO:0002765 † | immune response-inhibiting signal transduction                                            |
| 60 | GO:0002768 † | immune response-regulating cell surface receptor signaling pathway                        |
| 61 | GO:0052552   | modulation by organism of immune response of other organism                               |
|    |              | involved in symbiotic interaction                                                         |
| 62 | GO:0002819 † | regulation of adaptive immune response                                                    |
| 63 | GO:0002718 † | regulation of cytokine production involved in immune response                             |
| 64 | GO:0043309   | regulation of eosinophil degranulation                                                    |
| 65 | GO:0002920 † | regulation of humoral immune response                                                     |
| 66 | GO:0002837 † | regulation of immune response to tumor cell                                               |
| 67 | GO:0002861 † | regulation of inflammatory response to antigenic stimulus                                 |
| 68 | GO:0033006 † | regulation of mast cell activation involved in immune response                            |
| 69 | GO:0043380   | regulation of memory T cell differentiation                                               |
| 70 | GO:0043313   | regulation of neutrophil degranulation                                                    |
| 71 | GO:0045622 † | regulation of T-helper cell differentiation                                               |
| 72 | GO:0002828 † | regulation of type 2 immune response                                                      |
| 73 | GO:0042092 † | type 2 immune response                                                                    |
| 74 | GO:0002520   | immune system development                                                                 |
| 75 | GO:0002366 † | leukocyte activation involved in immune response                                          |

|     |              |                                                                                                                           |
|-----|--------------|---------------------------------------------------------------------------------------------------------------------------|
| 76  | GO:0050902   | leukocyte adhesive activation                                                                                             |
| 77  | GO:0042113 † | B cell activation                                                                                                         |
| 78  | GO:0001767   | establishment of lymphocyte polarity                                                                                      |
| 79  | GO:0001771   | immunological synapse formation                                                                                           |
| 80  | GO:0002285 † | lymphocyte activation involved in immune response                                                                         |
| 81  | GO:0030098 † | lymphocyte differentiation                                                                                                |
| 82  | GO:0046651 † | lymphocyte proliferation                                                                                                  |
| 83  | GO:0030101 † | natural killer cell activation                                                                                            |
| 84  | GO:0051250 † | negative regulation of lymphocyte activation                                                                              |
| 85  | GO:0031294 † | lymphocyte costimulation                                                                                                  |
| 86  | GO:0050871 † | positive regulation of B cell activation                                                                                  |
| 87  | GO:0045621 † | positive regulation of lymphocyte differentiation                                                                         |
| 88  | GO:0050671 † | positive regulation of lymphocyte proliferation                                                                           |
| 89  | GO:0032816 † | positive regulation of natural killer cell activation                                                                     |
| 90  | GO:0050870 † | positive regulation of T cell activation                                                                                  |
| 91  | GO:0050864 † | regulation of B cell activation                                                                                           |
| 92  | GO:0045619 † | regulation of lymphocyte differentiation                                                                                  |
| 93  | GO:0050670 † | regulation of lymphocyte proliferation                                                                                    |
| 94  | GO:0032814 † | regulation of natural killer cell activation                                                                              |
| 95  | GO:0050863 † | regulation of T cell activation                                                                                           |
| 96  | GO:0050868 † | negative regulation of T cell activation                                                                                  |
| 97  | GO:0046634 † | regulation of alpha-beta T cell activation                                                                                |
| 98  | GO:0046643 † | regulation of gamma-delta T cell activation                                                                               |
| 99  | GO:2001188   | regulation of T cell activation via T cell receptor contact with antigen bound to MHC molecule on antigen presenting cell |
| 100 | GO:0045580 † | regulation of T cell differentiation                                                                                      |
| 101 | GO:0042129 † | regulation of T cell proliferation                                                                                        |
| 102 | GO:0046631 † | alpha-beta T cell activation                                                                                              |
| 103 | GO:0001768   | establishment of T cell polarity                                                                                          |
| 104 | GO:0046629 † | gamma-delta T cell activation                                                                                             |
| 105 | GO:0035709   | memory T cell activation                                                                                                  |
| 106 | GO:0002286 † | T cell activation involved in immune response                                                                             |
| 107 | GO:0030217 † | T cell differentiation                                                                                                    |
| 108 | GO:0042098 † | T cell proliferation                                                                                                      |
| 109 | GO:0002274 † | myeloid leukocyte activation                                                                                              |
| 110 | GO:0002695 † | negative regulation of leukocyte activation                                                                               |
| 111 | GO:0002696 † | positive regulation of leukocyte activation                                                                               |
| 112 | GO:0043030 † | regulation of macrophage activation                                                                                       |
| 113 | GO:0033003 † | regulation of mast cell activation                                                                                        |
| 114 | GO:0030885   | regulation of myeloid dendritic cell activation                                                                           |
| 115 | GO:0001776 † | leukocyte homeostasis                                                                                                     |
| 116 | GO:0050900 † | leukocyte migration                                                                                                       |
| 117 | GO:0002262 † | myeloid cell homeostasis                                                                                                  |
| 118 | GO:0002683 † | negative regulation of immune system process                                                                              |
| 119 | GO:0050857 † | positive regulation of antigen receptor-mediated signaling pathway                                                        |
| 120 | GO:0060369   | positive regulation of Fc receptor mediated stimulatory signaling pathway                                                 |
| 121 | GO:0002253 † | activation of immune response                                                                                             |
| 122 | GO:0002687 † | positive regulation of leukocyte migration                                                                                |
| 123 | GO:0070426   | positive regulation of nucleotide-binding oligomerization domain containing signaling pathway                             |
| 124 | GO:2000525   | positive regulation of T cell costimulation                                                                               |
| 125 | GO:0002645 † | positive regulation of tolerance induction                                                                                |
| 126 | GO:0034123 † | positive regulation of toll-like receptor signaling pathway                                                               |
| 127 | GO:0002440 † | production of molecular mediator of immune response                                                                       |
| 128 | GO:0002682   | regulation of immune system process                                                                                       |
| 129 | GO:0002200 † | somatic diversification of immune receptors                                                                               |
| 130 | GO:0045058 † | T cell selection                                                                                                          |
| 131 | GO:0002507 † | tolerance induction                                                                                                       |

\*: significant (FDR<0.05) in pre-ATI †: significant (FDR<0.05) in post-ATI
